# Supplementary material for: Good news reduces trust in government and its efficacy: The case of the Pfizer/BioNTech vaccine announcement
Source: PLoS One. 2021 Dec 9;16(12):e0260216. doi: 10.1371/journal.pone.0260216 (PMC8659308; doi:10.1371/journal.pone.0260216)
Supplement: S5 Table — (ZIP) [file pone.0260216.s005.zip]

Archive with 2 entries (2 files):
- s5_table.pdf
- s5_table.tex
