# Supplementary material for: Good news reduces trust in government and its efficacy: The case of the Pfizer/BioNTech vaccine announcement
Source: PLoS One. 2021 Dec 9;16(12):e0260216. doi: 10.1371/journal.pone.0260216 (PMC8659308; doi:10.1371/journal.pone.0260216)
Supplement: S5 Table — (ZIP) [file pone.0260216.s005.zip › s5_table.pdf]

**S5 Table.** Treatment effects of vaccine announcement with hour-robust standard errors

|                                | United States        |                       |                    | United Kingdom        |                      |                      |
|--------------------------------|----------------------|-----------------------|--------------------|-----------------------|----------------------|----------------------|
|                                | All respondents      | Highly exposed        | Risk group         | All respondents       | Highly exposed       | Risk group           |
| <b>Government assessment</b>   |                      |                       |                    |                       |                      |                      |
| Trust in government            | -0.142**<br>(0.054)  | -0.202**<br>(0.078)   | -0.039<br>(0.095)  | -0.116***<br>(0.035)  | -0.199***<br>(0.055) | -0.204***<br>(0.062) |
| Trust in politicians           | -0.174***<br>(0.062) | -0.285***<br>(0.079)  | -0.220<br>(0.154)  | -0.129<br>(0.078)     | -0.290***<br>(0.040) | -0.193<br>(0.129)    |
| Government competency          | -0.152**<br>(0.063)  | -0.108<br>(0.079)     | -0.138<br>(0.133)  | -0.159**<br>(0.068)   | -0.217***<br>(0.059) | -0.280*<br>(0.161)   |
| <b>Measures of anxiety</b>     |                      |                       |                    |                       |                      |                      |
| Concern                        | 0.125**<br>(0.051)   | -0.045<br>(0.075)     | 0.084<br>(0.072)   | 0.040<br>(0.067)      | 0.044<br>(0.080)     | -0.106<br>(0.083)    |
| Economic concern               | 0.078**<br>(0.037)   | 0.054<br>(0.051)      | -0.049<br>(0.075)  | -0.089**<br>(0.041)   | -0.112<br>(0.069)    | -0.227<br>(0.131)    |
| <b>Beliefs about the world</b> |                      |                       |                    |                       |                      |                      |
| Seriousness                    | 0.045<br>(0.045)     | -0.011<br>(0.065)     | 0.058<br>(0.068)   | -0.004<br>(0.055)     | -0.039<br>(0.064)    | -0.022<br>(0.064)    |
| Others follow guidelines       | -0.100<br>(0.081)    | -0.171**<br>(0.076)   | -0.060<br>(0.161)  | 0.003<br>(0.063)      | -0.135<br>(0.132)    | 0.077<br>(0.150)     |
| Luck vs. effort                | -0.034<br>(0.132)    | 0.004<br>(0.291)      | 0.235<br>(0.365)   | -0.189<br>(0.194)     | -0.423<br>(0.336)    | -1.177***<br>(0.386) |
| <b>Elicited behaviors</b>      |                      |                       |                    |                       |                      |                      |
| Willingness to pay             | 0.769<br>(6.565)     | -20.185**<br>(9.473)  | 4.990<br>(12.182)  | -11.164***<br>(2.922) | -8.021*<br>(4.586)   | -25.325**<br>(9.608) |
| Willingness to comply          | -0.027<br>(0.056)    | -0.120<br>(0.084)     | 0.149<br>(0.109)   | 0.006<br>(0.054)      | 0.092<br>(0.081)     | 0.067<br>(0.123)     |
| <b>Social capital</b>          |                      |                       |                    |                       |                      |                      |
| Patience                       | -0.070<br>(0.176)    | 0.073<br>(0.266)      | 0.335<br>(0.358)   | -0.295<br>(0.172)     | -0.180<br>(0.210)    | -0.718*<br>(0.362)   |
| Generalized trust              | 0.043<br>(0.029)     | 0.054<br>(0.039)      | 0.032<br>(0.063)   | -0.014<br>(0.020)     | -0.072**<br>(0.034)  | 0.074<br>(0.056)     |
| Risk taking                    | -0.226*<br>(0.118)   | -0.178<br>(0.228)     | -0.462*<br>(0.247) | -0.051<br>(0.116)     | 0.247<br>(0.205)     | -0.030<br>(0.328)    |
| Dictator game sharing          | 0.039<br>(0.103)     | 0.342<br>(0.200)      | 0.039<br>(0.190)   | -0.042<br>(0.108)     | -0.012<br>(0.246)    | -0.400<br>(0.333)    |
| Altruism                       | 0.756<br>(14.363)    | -29.318**<br>(12.586) | 21.760<br>(28.713) | -3.670<br>(9.243)     | 13.697<br>(13.755)   | -13.951<br>(12.039)  |
| Observations                   | 1,381                | 605                   | 448                | 1,236                 | 457                  | 234                  |

*Notes:* Each estimate comes from an individual linear regression. Trust in government ranges from 1-4, trust in politicians and government competency from 1-5 with higher values indicating a more positive assessment. Measures of anxiety range from 1 to 4 with higher values indicating more concern. Seriousness (1-4) captures the perceived seriousness of COVID-19 compared to the flu. Others follow guidelines (1-5) captures the perceived likelihood that others comply with government guidelines. Luck vs. Effort (0-10) indicates whether income differences are perceived to result from luck (0) or from effort (10). Willingness to pay ranges from \$/£0 to £200/\$260 capturing the amount respondent is willing to pay for a treatment to reduce own mortality from COVID-19. Willingness to comply (1-4) captures the self-reported likelihood to comply with guidelines. For all social capital variables, higher values indicate more patience (0-10), trust (0-1), willingness to take risks (0-10), dictator game sharing (0-10) and altruism (0-1000). Controls include gender, age, political affiliation, education and income. Hour-clustered standard errors are in parenthesis. \*\*\* p<0.01, \*\* p<0.05, \* p<0.1.

S5 Table reports our main results with hour-clustered standard errors. We first look at the effects of the vaccine news on all our respondents. We then look specifically at respondents who are either highly exposed to catching the virus – as they are required to commute for work on an above average amount of days per week – or are in the risk group – as defined by government guidelines in the US and UK, due to age or pre-existing conditions.

Our main results remain the same as with region-clustered standard errors, with trust in government and trust in elected politicians being significantly lower post-vaccine announcement than prior to the announcement. We also find some evidence that government competency is assessed more negatively in the UK for all respondents, but particularly for those who are highly exposed. Apart from this significant treatment effect on government assessment, we do not find any consistent effect of the vaccine news on any of the other categories of variables.
